# Supplementary material for: Attainment and characteristics of clinical remission according to the new ACR-EULAR criteria in abatacept-treated patients with early rheumatoid arthritis: new analyses from the Abatacept study to Gauge Remission and joint damage progression in methotrexate (MTX)-naive patients with Early Erosive rheumatoid arthritis (AGREE)
Source: PubMed Central journal article supplement (PMC4494702; doi:10.1186/s13075-015-0671-9), 2015-06-11

**Supplementary Figure 1 Additional disease activity outcomes.**

**A.** Boolean remission rates. Based on patients with data available at baseline, Month 6 and Month 12. **B.** LDA rates at Months 6 and 12 for DAS28, SDAI and CDAI. DAS28 LDA = DAS28  $\leq$ 3.2; SDAI LDA = SDAI  $\leq$ 11; CDAI LDA = CDAI  $\leq$ 10. Boolean remission definitions according to three criteria (28 joints) = TJC28  $\leq$ 1 and SJC28  $\leq$ 1 and PGA (0–10 cm VAS)  $\leq$ 1 cm; all criteria (66/68 joints) = TJC66/68  $\leq$ 1 and SJC66/68  $\leq$ 1 and CRP  $\leq$ 1 mg/dL and PGA  $\leq$ 1 cm; and three criteria (66/68 joints) = TJC66/68  $\leq$ 1 and SJC66/68  $\leq$ 1 and PGA  $\leq$ 1 cm. CDAI = Clinical Disease Activity Index; CI = confidence interval; CRP = C-reactive protein; DAS28 = disease activity score using 28 joint counts; MTX = methotrexate; LDA = low disease activity; PGA = patient global assessment; SDAI = Simplified Disease Activity Index; SJC = swollen joint count; TJC = tender joint count.

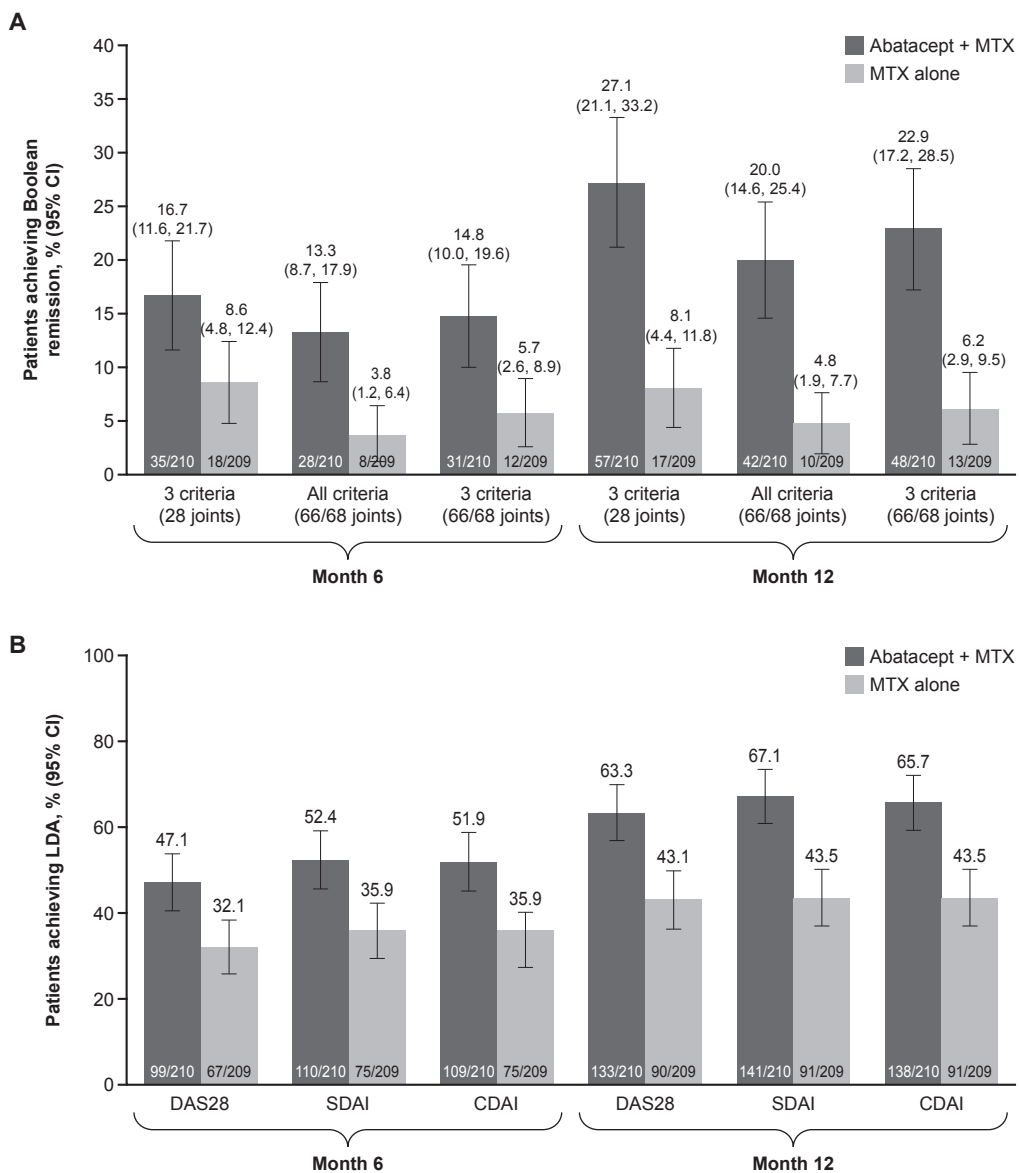

Supplement: 13075_2015_671_MOESM4_ESM.pdf [file 13075_2015_671_MOESM4_ESM.pdf]
