# Supplementary material for: Attainment and characteristics of clinical remission according to the new ACR-EULAR criteria in abatacept-treated patients with early rheumatoid arthritis: new analyses from the Abatacept study to Gauge Remission and joint damage progression in methotrexate (MTX)-naive patients with Early Erosive rheumatoid arthritis (AGREE)
Source: PubMed Central journal article supplement (PMC4494702; doi:10.1186/s13075-015-0671-9), 2015-06-11

**Supplementary Figure 3 Core set variables for patients in remission.**

Data are based on patients with data available at baseline, Month 6 and Month 12. Data presented are min, Q1, median, Q3 and max values from bottom to top of the box plot, respectively. Dotted line indicates ACR-EULAR Boolean remission criteria cut-off of  $\leq 1$  for SJC, TJC, PGA and CRP (mg/dL). ACR = American College of Rheumatology; DAS28 remission = DAS28 (CRP)  $< 2.6$ ; SDAI remission = SDAI  $\leq 3.3$ ; CDAI remission =  $\leq 2.8$ . CDAI = Clinical Disease Activity Index; CRP = C-reactive protein; DAS28 = disease activity score using 28 joint counts; EGA = evaluator's global assessment; EULAR = European League Against Rheumatism; MTX = methotrexate; PGA = patient global assessment; SDAI = Simplified Disease Activity Index; SJC = swollen joint count; TJC = tender joint count; VAS = visual analog scale.

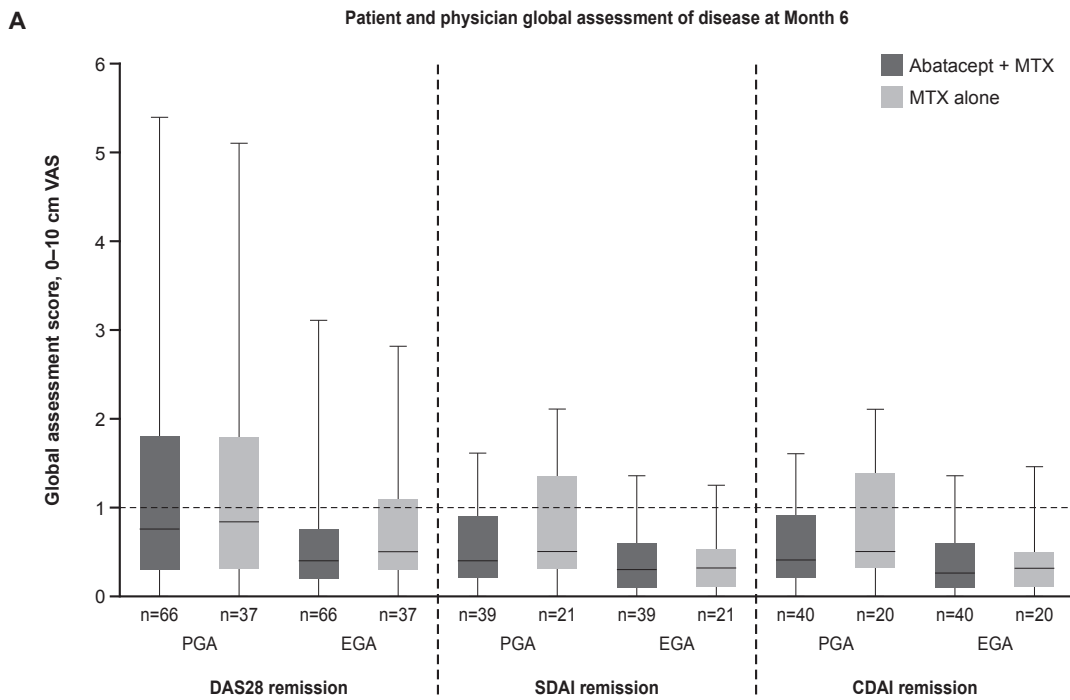

**B**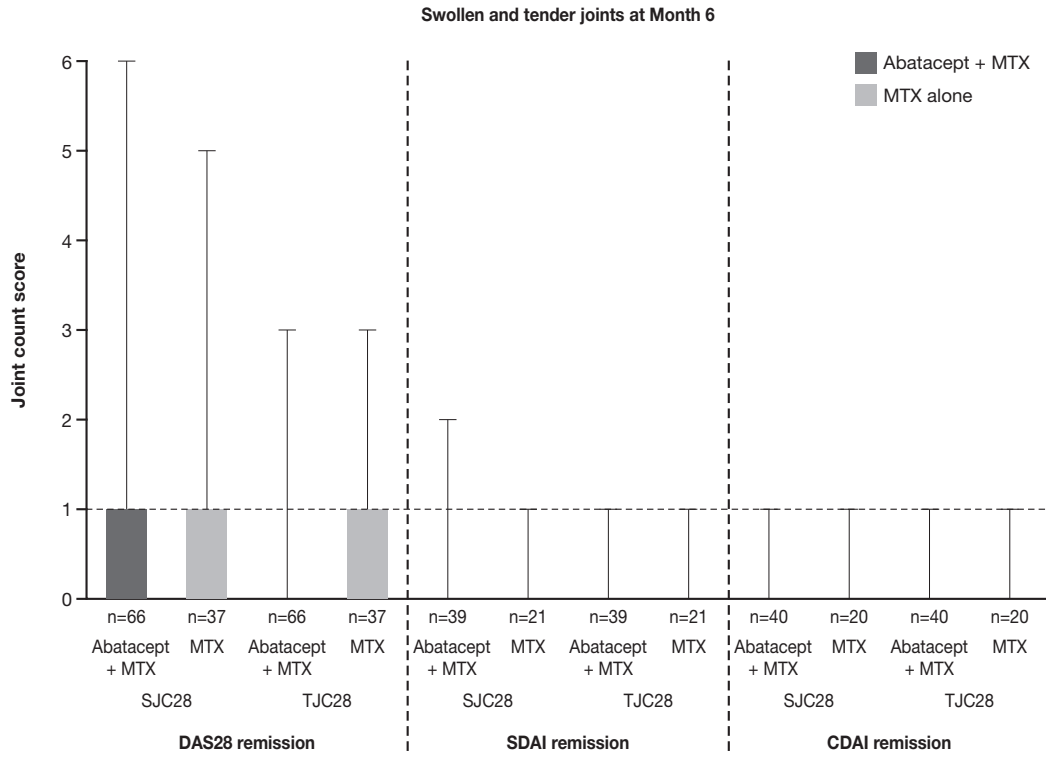**C**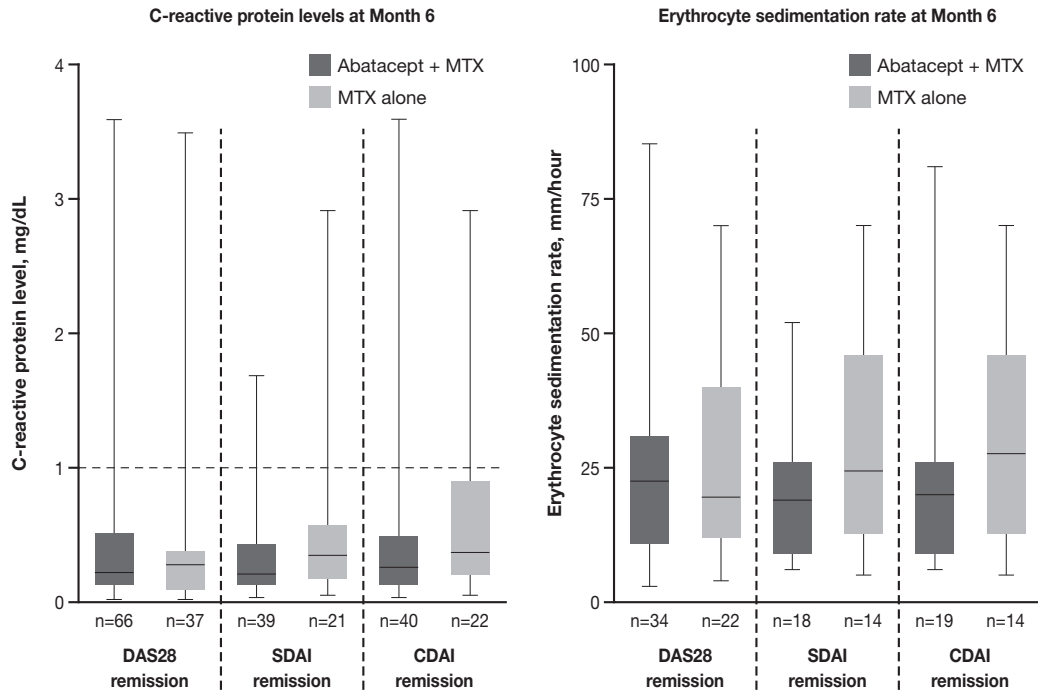

Supplement: 13075_2015_671_MOESM6_ESM.pdf [file 13075_2015_671_MOESM6_ESM.pdf]
